# Supplementary material for: Targeting Neoepitopes to Treat Solid Malignancies: Immunosurgery
Source: Frontiers journal article supplement (doi:10.3389/fimmu.2021.592031), 2021-07-15
Supplement: Data_Sheet_1.PDF [file Data_Sheet_1.PDF]

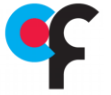

## **Mutation Analysis Whole Exome Sequencing (WES)**

**Champalimaud  
Foundation**

**Supplementary Data Set 1: List of immune response genes or tumor – associated genes that are particularly scrutinized in the course of tumor WES.**

*List of genes associated with immune – surveillance and DNA repair (CF-Version0.3.March.25.2018)*

| Gene                                  | Description                                                                                                                       |
|---------------------------------------|-----------------------------------------------------------------------------------------------------------------------------------|
| <b>Canonical MHC class I pathway</b>  |                                                                                                                                   |
| HLA-A                                 | Major human HLA class I complex for presenting protein antigens                                                                   |
| HLA-B                                 | Major human HLA class I complex for presenting protein antigens                                                                   |
| HLA-C                                 | Major human HLA class I complex for presenting protein antigens                                                                   |
| B2M/IMD43                             | Beta-2-microglobulin; integral part of MHC-I complex                                                                              |
| TAP1                                  | Transporter associated with antigen processing 1; export of nascent peptides into the ER for MHC-I loading                        |
| TAP2                                  | Transporter associated with antigen processing 2; export of nascent peptides into the ER for MHC-I loading                        |
| CALR                                  | Calreticulin, involved in antigen processing and loading                                                                          |
| PSMB5                                 | Proteasome subunit beta type-7; belongs to catalytic unit; important for generating peptide antigens                              |
| PSMB6                                 | Proteasome subunit beta type-6; belongs to catalytic unit; important for generating peptide antigens                              |
| PSMB7                                 | Proteasome subunit beta type-7; belongs to catalytic unit; important for generating peptide antigens                              |
| LMP7/PSMB8                            | Proteasome subunit beta type-8, belongs to catalytic unit; important for generating peptide antigens                              |
| TAPBP                                 | Tapasin, involved in the interaction between MHC class I and TAP for peptide loading                                              |
| LMP2/PSMB9                            | Proteasome subunit beta type-9, belongs to catalytic unit; important for generating peptide antigens                              |
| MECL1/PSMB10                          | Proteasome subunit beta type-10; belongs to catalytic unit; important for generating peptide antigens                             |
| PDIA3/GRP58                           | Protein disulfide-isomerase A3/glucose-regulated protein, 58-kD; involved in export of fully formed MHC-I-peptide complex from ER |
| CNX                                   | Calnexin, involved in folding of MHC-I molecules in ER                                                                            |
| <b>Canonical MHC class II pathway</b> |                                                                                                                                   |
| HLA-DR                                | Human Leukocyte Antigen – antigen D Related (DRA, DRB1,3,4,5)                                                                     |
| HLA-DQ                                | Human Leukocyte Antigen, class II, implicated in autoimmune pathology (DQA1 & DQB1)                                               |
| HLA-DP                                | Human Leukocyte Antigen, class II, implicated in GVHD (DPA1 & DPB1)                                                               |
| HLA-DOA                               | HLA class II histocompatibility antigen, DO alpha chain; forms dimer with DOB                                                     |
| HLA-DOB                               | HLA class II histocompatibility antigen, DO beta chain; forms dimer with DOA                                                      |
| HLA-DMA                               | HLA class II histocompatibility antigen, DM alpha chain; forms dimer with DMB; involved in MHC-II peptide loading                 |
| HLA-DMB                               | HLA class II histocompatibility antigen, DM beta chain; forms dimer with DMA; involved in MHC-II peptide loading                  |

|                                                                 |                                                                                                                                                                                                                                                                                                                                                                                           |
|-----------------------------------------------------------------|-------------------------------------------------------------------------------------------------------------------------------------------------------------------------------------------------------------------------------------------------------------------------------------------------------------------------------------------------------------------------------------------|
| CD74                                                            | HLA-DR invariant chain; can also be expressed on the cell surface; involved in formation and transport of HLA-DR                                                                                                                                                                                                                                                                          |
| CLIP                                                            | Class II-associated invariant chain peptide; keeps MHC-II peptide-binding groove from binding of self-peptides until start of interaction with HLA-DM                                                                                                                                                                                                                                     |
| CaM                                                             | Calmodulin; Ca <sup>2+</sup> chaperone; probably involved in the generation of MHC-II antigens in cells                                                                                                                                                                                                                                                                                   |
| RAB5                                                            | GTPase involved in phagolysosome formation, which is essential for the generation of antigenic peptides that bind to the MHC-II groove                                                                                                                                                                                                                                                    |
| CIITA                                                           | MHC-II transactivator; important for IFN- $\gamma$ -driven expression of HLA-DR                                                                                                                                                                                                                                                                                                           |
| <b><i>Non-canonical MHC class I molecules</i></b>               |                                                                                                                                                                                                                                                                                                                                                                                           |
| HLA-E                                                           | HLA class I histocompatibility antigen, alpha chain E; modulate NK-cell cytotoxicity                                                                                                                                                                                                                                                                                                      |
| HLA-G                                                           | HLA-G histocompatibility antigen, class I, G; has a role in immune tolerance and also prevents NK-cell cytotoxicity                                                                                                                                                                                                                                                                       |
| MICA                                                            | MHC class I polypeptide-related sequence A; ligand for NKG2D on gamma-delta ( $\gamma\delta$ ) T cells, NK cells and conventional CD8 T cells                                                                                                                                                                                                                                             |
| MICB                                                            | MHC class I polypeptide-related sequence B; ligand for NKG2D on gamma-delta ( $\gamma\delta$ ) T cells, NK cells and conventional CD8 T cells                                                                                                                                                                                                                                             |
| CD1a                                                            | Presentation of lipid antigens to T cells; present on professional APCs                                                                                                                                                                                                                                                                                                                   |
| CD1b                                                            | Presentation of lipid antigens to T cells; present on professional APCs                                                                                                                                                                                                                                                                                                                   |
| CD1c                                                            | Presentation of lipid antigens to T cells; present on professional APCs                                                                                                                                                                                                                                                                                                                   |
| CD1d                                                            | Presentation of lipid antigens to NKT cells; present on professional APCs and other cell types                                                                                                                                                                                                                                                                                            |
| CD1e                                                            | Intermediate form of CD1 molecule that is expressed intracellularly                                                                                                                                                                                                                                                                                                                       |
| <b><i>Surface molecules associated with T-cell function</i></b> |                                                                                                                                                                                                                                                                                                                                                                                           |
| CD2                                                             | Also known as lymphocyte function-associated antigen-2 (LFA-2); expressed on T cells and NK cells; requires for migration; might also play a role in activation by co-stimulation during immune synapse                                                                                                                                                                                   |
| CD3                                                             | Indispensable co-receptor which not only identifies T cells but also is pivotal in engaging the peptide-MHC complex to trigger T-cell activation. Also important are immunoreceptor tyrosine-based activating motifs (ITAMs) found in the cytoplasmic tail of CD3 (zeta chain, CD247), contains ITAMs necessary for ZAP-70 binding and downstream signalling to initiate T-cell responses |
| CD4                                                             | Important helper T cell recognition receptor; attaches to MHC-II during immune synapse; also binds IL-16                                                                                                                                                                                                                                                                                  |
| CD6                                                             | Expressed on T-cell surface and has a role during the immune activation phase                                                                                                                                                                                                                                                                                                             |
| CD7                                                             | Expressed on mature T-cell surface and has a role in T-cell activation and engagement with B cells                                                                                                                                                                                                                                                                                        |
| CD8A                                                            | CD8 alpha chain; Important surface receptor to identify cytotoxic T cells; binds to MHC-I during immune synapse                                                                                                                                                                                                                                                                           |

|                |                                                                                                                                                                                                             |
|----------------|-------------------------------------------------------------------------------------------------------------------------------------------------------------------------------------------------------------|
| TRA/IMD7       | T-cell receptor (TCR) alpha locus; required for TCR structure formation                                                                                                                                     |
| TRB            | TCR beta locus; required for TCR structure formaton                                                                                                                                                         |
| TRAJ10         | TCR alpha joining 10; required also for generation of TCR repertoire diversity                                                                                                                              |
| CD80/B7-1      | Expressed on target cells and APCs; binds to CD28 to induce T-cell activation or CTLA-4 to induce tolerance                                                                                                 |
| CD86/B7-2      | Expressed on target cells and APCs; binds to CD28 to induce T-cell activation or CTLA-4 to induce tolerance                                                                                                 |
| CD28           | Expressed on T cells; involved in T-cell activation by binding to CD80/86                                                                                                                                   |
| BTN            | Butyrophilins; members of this large famiy of B7-related surface-bound molecules are involved in immune cell signalling, largely focussed on T-cell activation and function                                 |
| BTN3A1         | Butyrophilin subfamily 3 member A1; activation of V $\gamma$ 9V $\delta$ 2 T cells                                                                                                                          |
| PDCD1          | Programmed cell death 1 (PD-1); mainly expressed on T cells; some tumour cells too; inhibits T-cell function                                                                                                |
| PDCD1LG1/CD274 | PD-1 ligand 1; expressed on target cells, including cancer cells; impedes T-cell function                                                                                                                   |
| PDCD1LG2/CD273 | PD-1 ligand 2; expressed on target cells, including cancer cells; impedes T-cell function                                                                                                                   |
| CTLA4/CD152    | Cytotoxic T-lymphocyte associated antigen 4; mainly expressed on T cells; binds to CD80/86; inhibits T-cell function                                                                                        |
| HAVCR2/TIM3    | T-cell immunoglobulin and mucin-domain containing-3; mainly expressed on CD8 T cells; activated by galectin-9; inhibits T-cell function                                                                     |
| LAG3/CD223     | Lymphocyte-activation gene 3; mainly expressed on T cells; binds to MHC-II molecules; inhibits T-cell function                                                                                              |
| VISTA          | V-domain Ig suppressor of T cell activation; mainly expressed on myeloid cells; inhibits T-cell function                                                                                                    |
| FAS/CD95       | first apoptosis signal (Fas) receptor; expressed on a variety cell of types; can be overexpressed on tumour cells; binds to FasL on T cells to block apoptosis and allow immune evasion                     |
| FASLG/CD95L    | Fas ligand; bind to FasR; expressed on T cells                                                                                                                                                              |
| NKG2D/KLRK1    | Also known as CD314; expressed on CD8 T cells, NK cell, $\gamma\delta$ T cells; involved in cytotoxic activity upon recognition of and binding to non-canonical MHC-I molecules i.e. MICA/B on target cells |
| OX40           | Alos known as tumor necrosis factor receptor superfamily, member 4 (TNFRSF4), CD134 or OX40 receptor; expressed on activated T cells                                                                        |
| OX40L          | OX40 ligand, also known as CD252; expressed of dendritic cells as well as tumour cells; binds to OX40R/CD134                                                                                                |
| CD62L/SELL     | Also known as L-selectin; binds to GlyCAM-1; expressed on T cells for homing to secondary lymphoid organs; necessary for central memory T cells to elicit recall responses upon antigen encounter           |

|                                    |                                                                                                                                                                                                                                                                                                          |
|------------------------------------|----------------------------------------------------------------------------------------------------------------------------------------------------------------------------------------------------------------------------------------------------------------------------------------------------------|
| TNFRSF9/4-1BB                      | Also known as TNFR superfamily member 9 (TNFRSF9) or CD137; binds to TNFR-associated factor 2 (TRAF2); expressed on T cells, mainly CD8 T cells; essential for cytotoxic activity                                                                                                                        |
| ICOS/CD278                         | Inducible T-cell costimulator; expressed on activated T cells                                                                                                                                                                                                                                            |
| BTLA/CD272                         | B- and T-lymphocyte attenuator; expressed on activated T cells and B cells; binds TNFR superfamily member 14 (TNFRS14)                                                                                                                                                                                   |
| VLA1/ITGA1-ITGB1                   | Very-late-Antigen 1; also known as alpha integrin 1 beta integrin 1; collagen receptor expressed on memory CD4 T cells; also involved in T-cell penetration into the skin and lung, particularly in inflammation                                                                                         |
| CD27                               | Interacts with CD70; expressed on activated T cells; has immune checkpoint properties                                                                                                                                                                                                                    |
| CD69                               | Expressed on T cells and is involved in T-cell differentiation; also associated with retention of T cells in lymphoid organs as well as tissue residency                                                                                                                                                 |
| CD70                               | Ligand for CD27; expressed on activated T cells                                                                                                                                                                                                                                                          |
| LAMP1/CD107a                       | Lysosome-associated membrane protein 1; mainly expressed on lysosomal membranes and plays a role in cytotoxicity of T and NK cells; can also be detected on the cell surface - serves as a marker of degranulation                                                                                       |
| CD16/FCGR3A                        | Although not expressed on the surface of T cells, CD16 (also known as Fc $\gamma$ receptor III) expressed on the surface of tumour cells or other such target cells is needed for eliciting antibody-dependent cytotoxicity (ADCC) which involves NK cells and CD8 T cells; important for tumour control |
| <b><i>Cytokines/chemokines</i></b> |                                                                                                                                                                                                                                                                                                          |
| IL1A/haematopoietin 1              | IL-1 $\alpha$ ; produced by myeloid cells upon activation; involved in TNF- $\alpha$ synthesis                                                                                                                                                                                                           |
| IL1B                               | IL-1 $\beta$ ; produced by myeloid cells following inflammasome activation                                                                                                                                                                                                                               |
| IL2                                | Produced by T cells as an essential growth factor                                                                                                                                                                                                                                                        |
| IL3                                | Produced by T cells, mast cells and eosinophils; can activate APC functions and induce inflammation                                                                                                                                                                                                      |
| IL4                                | Produced by T cells; mainly involved in orchestration of Th2 responses and antibody production by B cells/plasma cells                                                                                                                                                                                   |
| IL5                                | Anti-inflammatory cytokine produced by Th2 cells and mast cells; also involved in antibody production by B cells                                                                                                                                                                                         |
| IL6                                | Pleiotropic cytokine released by activated myeloid cells; involved in pro-inflammatory activity by T cells; can also induce anti-inflammatory activity by Th2                                                                                                                                            |
| IL7                                | Important CD4-centric gamma-chain cytokine required for their growth and maintenance of memory pools; produced by stromal cells, epithelial cells, hepatocytes, keratinocytes                                                                                                                            |
| IL8/CXCL8                          | Important for neutrophil chemoattraction; produced by activated myeloid cells                                                                                                                                                                                                                            |
| IL9                                | Produced by Th9 cells and may have a role in anti-tumour responses                                                                                                                                                                                                                                       |

|      |                                                                                                                                                                                                                         |
|------|-------------------------------------------------------------------------------------------------------------------------------------------------------------------------------------------------------------------------|
| IL10 | Generally anti-inflammatory in nature, IL-10 also has some inflammatory properties as seen in chronic diseases; produced by myeloid cells (mainly monocytes but also macrophages and dendritic cells, DCs)              |
| IL11 | Produced mainly by stromal cells; important for megakaryocyte maturation                                                                                                                                                |
| IL12 | A cardinal pro-inflammatory cytokine produced by activated macrophages and DCs; essential for production of IFN-gamma by Th1 cells, jointly with IL-18                                                                  |
| IL13 | Involved in the production of IgE antibodies and is secreted by several cells types; including Th2 cells, mast cells and NK T cells; also has a role in tumour progression                                              |
| IL14 | Also known as alpha-taxilin; produced mainly by T cells and some malignant B cells; involved in expansion of B-cell subsets but inhibits antibody production                                                            |
| IL15 | Important gamma-chain cytokine involved in generation and maintenance of memory CD8 T cells; involved in promoting anti-tumour immune responses by memory T cells and NK cells                                          |
| IL16 | Produced by various cell types, including T cells; potent chemoattractant for activated T cells                                                                                                                         |
| IL17 | Pro-inflammatory cytokine produced by Th17 cells and some gamma-delta ( $\gamma\delta$ ) subsets; role in cancer remains controversial and the same for chronic infections                                              |
| IL18 | Pro-inflammatory cytokine produced by M1 macrophages and DCs upon inflammasome activation; essential for inducing IFN-gamma production by Th1 cells jointly with IL-12 activity                                         |
| IL19 | Produced by monocytes; may have a role in orchestrating inflammation and apoptosis                                                                                                                                      |
| IL20 | Produced by activated keratinocytes and monocytes; has a role in pro-inflammatory immune responses; belong to the IL-10 family of molecules                                                                             |
| IL21 | Important gamma-chain cytokine involved in maintenance of immunological memory in pools of high-affinity CD8 T cells; essential for antiviral immune responses and downregulation of regulatory T-cell (Treg) responses |
| IL22 | Generally pro-inflammatory in nature; produced by innate lymphoid cells and Th22 cells; may have a role in promoting anti-tumour immune responses                                                                       |
| IL23 | Comprises IL-12 $\beta$ and IL-23 $\alpha$ subunits; involved in pro-inflammatory activity; produced by activated myeloid cells                                                                                         |
| IL24 | Pro-inflammatory cytokine produced by activated myeloid cells and Th2 cells; can induce cell death in responsive cells                                                                                                  |
| IL25 | Also known as IL-17E and can induce NF- $\kappa$ B activation; produced by Th2 cells and mast cells during inflammation                                                                                                 |
| IL26 | Produced by herpesvirus-infected T cells; induces expression of IL-10 and IL-8; structurally similar to IL-10                                                                                                           |

|        |                                                                                                                                                                                                                                     |
|--------|-------------------------------------------------------------------------------------------------------------------------------------------------------------------------------------------------------------------------------------|
| IL27   | Comprises Epstein-Barr virus-induced gene 3 (EBI3 or IL-27 $\beta$ ) and IL-27p28; produced by APCs; upregulates IL-10; may have a role in differentiation of T cells; previously known as IL-30                                    |
| IL28   | Two isoforms exists - IL-28A and IL-28B; type III interferon; very similar to IL-29 in structure; important in antiviral immune defence; produced by myeloid cells                                                                  |
| IL29   | Very similar to IL-28 in structure; type III interferon; important in antiviral immune defence; produced by myeloid cells                                                                                                           |
| IL31   | Has a pro-inflammatory activity profile but is produced by Th2 cells as well as other cell types                                                                                                                                    |
| IL32   | Generally pro-inflammatory in nature; is involved in vitamin D3 and IFN-gamma signalling axis; produced by DCs and macrophages; may have a role in augmenting IL-15 activity and memory CD8 T-cell maintenance                      |
| IL33   | Produced by a myriad of cell types; including mast cells, activated myeloid cells, APCs; promotes IL-4 production by Th2                                                                                                            |
| IL34   | Produced largely by splenocytes; involved in promoting monocyte survival                                                                                                                                                            |
| IL35   | Produced by Tregs; comprises IL-12R $\alpha$ and IL-27 $\beta$ ; has immune-suppressive properties                                                                                                                                  |
| IL36   | Three main agonistic forms (alpha, beta and gamma) and one antagonistic form (R $\alpha$ ) Produced by epithelial cells; can induce NF- $\kappa$ B and MAPK activation, and T-cell activation as well as subsequent IL-2 production |
| IL37   | Belongs to IL-1 family; inhibits innate immune activation; produced by macrophages and epithelial cells                                                                                                                             |
| IL38   | Belongs to IL-1 family; produced by myeloid cells and a large variety of parenchymal cell types; inhibits IL-17 and IL-22 production by T cells                                                                                     |
| IL39   | Comprises IL-23p19 and EBI3; produced by activated B cells; has an effect on neutrophil expansion and activation                                                                                                                    |
| IL40   | Expressed by activated human B cells; may have an autocrine effect on B-cell expansion                                                                                                                                              |
| IFNA1  | Interferon alpha (IFN- $\alpha$ ); produced by activated myeloid cells; involved in initiation of inflammatory activity by innate immune cells and antiviral responses; might also play a role in anti-cancer responses             |
| IFNA2  | Interferon alpha 2; important for antiviral defence; might play a role in STING pathway and anti-cancer responses                                                                                                                   |
| IFNA17 | Interferon alpha 17; important for antiviral defence; might play a role in STING pathway and anti-cancer responses                                                                                                                  |
| IFNB1  | Interferon beta (IFN- $\beta$ ); produced by fibroblasts; major role in amplifying innate immune responses and antiviral defence                                                                                                    |
| IFNG   | Interferon gamma (IFN- $\gamma$ ); Major Th1 cytokine also produced by other T cells with inflammatory properties as well as NK cells; important against viruses, tumours and intracellular bacteria                                |

|               |                                                                                                                                                                                                                                                                                                                          |
|---------------|--------------------------------------------------------------------------------------------------------------------------------------------------------------------------------------------------------------------------------------------------------------------------------------------------------------------------|
| TNFA          | Tumour necrosis factor alpha; crucial anti-tumour defence molecule, also against intracellular bacteria and viruses; produced by activated myeloid cells and T cells; induces apoptosis of target cells                                                                                                                  |
| CXCL1/SCYB1   | Produced by activated myeloid cells, neutrophils, epithelial cells and importantly melanoma cells; impacts on various physiological processes including angiogenesis and wound healing                                                                                                                                   |
| CXCL2/SCYB2   | Also known as macrophage inhibitory protein 2 alpha (MIP2 $\alpha$ ); produced by monocytes and macrophages; chemoattractant for neutrophils and haematopoietic stem cells                                                                                                                                               |
| CXCL3/SCYB3   | Also known as macrophage inhibitory protein 2 beta (MIP2 $\beta$ ); produced by myeloid cells and epithelial cells; involved in monocyte migration and adhesion; also functions as a neutrophil chemoattractant                                                                                                          |
| CXCL4/SCYB4   | Released by platelets; promotes blood coagulation; also involved in inflammation and wound healing                                                                                                                                                                                                                       |
| CXCL5/SCYB5   | Produced by epithelial cells; has inflammatory activity; expressed in response to IL-1 $\beta$ and TNF- $\alpha$ exposure                                                                                                                                                                                                |
| CXCL6/SCYB6   | Also known as granulocyte chemotactic protein 2 (GCP2); produced by endothelial cells; chemoattractant for neutrophils                                                                                                                                                                                                   |
| CXCL7/SCYB7   | Produced by platelets; involved in mitogenesis, glucose metabolism, extracellular matrix synthesis; also neutrophil trafficking                                                                                                                                                                                          |
| CXCL8/SCYB8   | Also known as IL-8; produced by macrophages and epithelial cells; involved in neutrophil chemoattraction                                                                                                                                                                                                                 |
| CXCL9/SCYB9   | Produced by activated neutrophils and mast cells; T-cell chemoattractant; involved in amplification of Th1 responses in tissue, also CD8 T cell responses                                                                                                                                                                |
| CXCL10/SCYB10 | Also known as IFN-gamma-induced protein 10 kDa (IP-10); produced by activated macrophages, monocytes and DCs; also by mast cells and neutrophils; strong T-cell chemoattractant but also chemotactic for monocytes, macrophages and DCs; involved in amplification of Th1 responses in tissue, also CD8 T cell responses |
| CXCL11/SCYB11 | Produced by mast cells; T-cell chemoattractant; involved in amplification of Th1 responses in tissue, also CD8 T cell responses                                                                                                                                                                                          |
| CXCL12/SCYB12 | Produced by CXCL12-abundant reticular cells and epithelial cells; functions as a B-cell chemoattractant; also involved in central memory T-cell trafficking                                                                                                                                                              |
| CXCL13/SCYB13 | Produced by ollicular DCs and mesencymal stromal cells; important function in the B-cell zone and interaction with T cells in lymph nodes                                                                                                                                                                                |
| CXCL14/SCYB14 | Produced by fibroblasts; an important DC and monocyte chemoattractant                                                                                                                                                                                                                                                    |
| CXCL16/SCYB16 | Produced by DC in response to viral infections; involved in migration and survival of NKT cells as well as innate lymphoid cells                                                                                                                                                                                         |
| CXCL17/VCC1   | Constitutively expressed by lung cells; DC and monocyte chemoattractant                                                                                                                                                                                                                                                  |



|              |                                                                                                                                                                                                                                               |
|--------------|-----------------------------------------------------------------------------------------------------------------------------------------------------------------------------------------------------------------------------------------------|
| XCL1/SCYC1   | A type of lymphotactin; found in various tissue including spleen, intestines and peripheral blood; CD8 T cells in blood, NK cells and DCs also produce this chemokine; chemoattractant for T cells; macrophages and fibroblasts               |
| XCL2/SCYC2   | A type of lymphotactin; produced mainly by T cells; chemoattractant for T cells; macrophages and fibroblasts                                                                                                                                  |
| CX3CL1/SCYD1 | Also known as fractalkine; produced by activated DCs and macrophages; soluble and cell-bound versions exist; acts as a chemoattractant of T cells and monocytes                                                                               |
| CCL1/SCYA1   | Produced by activated T cells; chemoattractant for monocytes, DCs, NK cells and immature B cells; also involved in Th2 cell and Treg trafficking                                                                                              |
| CCL2/SCYA2   | Also known as monocyte chemoattractant protein 1 (MCP-1); produced by activated myeloid cells; chemoattractant for monocytes, DCs and T cells; involved in amplifying the inflammatory response                                               |
| CCL3/SCYA3   | Also known as macrophage inflammatory protein 1-alpha (MIP-1 $\alpha$ ); produced by activated macrophages; is chemotactic for neutrophils                                                                                                    |
| CCL4/SCYA4   | Also known as macrophage inflammatory protein 1-beta (MIP-1 $\beta$ ); produced by monocytes, B Cells, T Cells, fibroblasts, endothelial as well as epithelial cells.; is chemotactic for monocytes, NK cells                                 |
| CCL5/SCYA5   | Also known as RANTES; produced by Th1 cells and CD8 T cells; can activated NK cells and myeloid cells (also APCs); has suppressive effects on HIV-infected cells                                                                              |
| CCL7/SCYA7   | Produced by macrophages and some tumour cell lines as well as stromal cells; chemoattractant for monocytes and regulation of T-cell function                                                                                                  |
| CCL8/SCYA8   | Also known as monocyte chemoattractant protein 2 (MCP-2); produced by fibroblasts and endothelial cells; chemotactic for various immune cell types including T cells, NK cells, mast cells, monocytes; also involved in T-cell homing to skin |
| CCL9/SCYA9   | Previously known as CCL10; now also known as macrophage inflammatory protein-1 gamma (MIP-1 $\gamma$ ); produced by macrophages and other myeloid cell types; also by follicle-associated epithelial cells                                    |
| CCL11/SCYA11 | Also known as eotaxin; produced by stromal cells and activated myeloid cells; chemotactic for eosinophils                                                                                                                                     |
| CCL13/SCYA13 | Also known as monocyte chemotactic protein 4 (MCP-4); produced by airway epithelial cells; chemotactic for eosinophils; T cells; basophils; monocytes                                                                                         |
| CCL14/SCYA14 | Produced by various cells types including splenocytes, myocytes and hepatocytes; activates monocytes                                                                                                                                          |
| CCL15/SCYA15 | Also known as leukotactin-1; expressed by cells in the liver and gut; function is not very clear                                                                                                                                              |
| CCL16/SCYA16 | Also known as monotactin-1; produced by cells in the liver, thymus and spleen; chemotactic for lymphocytes and monocytes                                                                                                                      |

|                                            |                                                                                                                                                                                                                                                       |
|--------------------------------------------|-------------------------------------------------------------------------------------------------------------------------------------------------------------------------------------------------------------------------------------------------------|
| CCL17/SCYA17                               | Also known as thymus and activation regulated chemokine (TARC); produced in thymic cells; is chemotactic for T cells;                                                                                                                                 |
| CCL18/SCYA18                               | Produced mainly by monocytes, DCs and macrophages; chemotactic for T cells and immature B cells; also DCs                                                                                                                                             |
| CCL19/SCYA19                               | Produced by activated macrophages and DCs; involved in thymic T-cell trafficking and lymphocyte migration to secondary lymphoid organs; also attracts CCR7+ central memory T cells                                                                    |
| CCL20/SCYA20                               | Also known as macrophage inflammatory protein 3 (MIP-3A); chemotactic for lymphocytes; also DCs to a lesser extent; produced by various cells types including APCs                                                                                    |
| CCL21/SCYA20                               | Produced by stromal cells and fibroblastic reticular cells; cell-bound form of CCL21 expressed by activated DCs; involved in homing of T cells and DCs to lymph nodes                                                                                 |
| CCL22/SCYA22                               | Produced by DCs and macrophages; important for Th2 and Treg migration into lymph nodes during inflammation                                                                                                                                            |
| CCL23/SCYA23                               | Also known as myeloid progenitor inhibitory factor 1 (MPIF-1); expressed mainly by cells in the lung and liver; chemotactic for resting T cells and monocytes; lesser extent for neutrophils                                                          |
| CCL24/SCYA24                               | Also known as myeloid progenitor inhibitory factor 2 (MPIF-2); chemotactic for resting T cells and to lesser extent for neutrophils                                                                                                                   |
| CCL25/SCYA25                               | Also known as thymus-expressed chemokine (TECK); produced by epithelial cells; involved in T-cell development; chemotactic for macrophages, DCs and thymocytes                                                                                        |
| CCL26/SCYA26                               | Also known as eotaxin-3; expressed by several cell types including heart and liver cells; chemotactic for neutrophils and basophils                                                                                                                   |
| CCL27/SCYA27                               | Also known as cutaneous T-cell-attracting chemokine (CTACK); expressed in several tissue types including thymus, placenta and skin; involved in T-cell trafficking to the skin                                                                        |
| CCL28/SCYA28                               | Also known as mucosae-associated epithelial chemokine (MEC); produced by several tissue types including gut, lung and breast involved in T-cell and IgA+ plasma cell trafficking/homing to mucosal tissues i.e. pulmonary, mammary glands; intestines |
| CSF2                                       | Also known as granulocyte-macrophage colony-stimulating factor (GM-CSF); important for differentiation of macrophages from monocytes; T cells also respond to this cytokine and in fact produce them; also DCs, mast cells, fibroblasts and NK cells  |
| LTA/TNFB                                   | Lymphotoxin alpha (LT $\alpha$ ); previously known as TNF- $\beta$ ; produced by T cells; enhances cell adhesion to endothelia, thus cell migration and trafficking; also involved in apoptosis induction, similar to TNF- $\alpha$                   |
| LTB/TNFC                                   | Lymphotoxin beta (LT $\beta$ ); previously known as TNF-C; type II membrane-bound protein; can form a heterodimer with LT $\alpha$ ; involved in apoptosis induction                                                                                  |
| <b><i>Cytokine/chemokine receptors</i></b> |                                                                                                                                                                                                                                                       |
| IFNAR1                                     | Interferon alpha receptor 1; binds IFN- $\alpha/\beta$ ; expressed on T cells                                                                                                                                                                         |

|                |                                                                                                                                                                              |
|----------------|------------------------------------------------------------------------------------------------------------------------------------------------------------------------------|
| IFNAR2         | Interferon alpha receptor 2; binds IFN- $\alpha/\beta$ ; expressed on T cells                                                                                                |
| IFNGR1         | Interferon gamma receptor 1; mandatory for IFN-gamma signalling in cells                                                                                                     |
| IFNGR2         | Interferon gamma receptor 2; mandatory for IFN-gamma signalling in cells                                                                                                     |
| TNFRSF1A       | Tumor necrosis factor receptor superfamily member 1A; binds to and is essential for TNF-alpha signalling in cells                                                            |
| TNFRSF1B       | Tumor necrosis factor receptor superfamily member 1B; binds to and is essential for TNF-alpha signalling in cells                                                            |
| IL1R1/CD121A   | Interleukin 1 receptor; important for IL-1 $\beta$ -mediated pro-inflammatory activity produced by inflammasome activation; expressed on T cells                             |
| IL2RA/CD25     | IL-2 receptor alpha subunit; binds to IL-2, the most important T-cell growth factor produced by T cells themselves.                                                          |
| IL2RB          | IL-2 receptor beta subunit; forms a trimer with CD25 and CD132 to constitute the IL-2R complex for binding IL-2                                                              |
| IL2RG/CD132    | IL-2 receptor gamma subunit; also known as common gamma chain, essential for gamma-chain cytokine signalling                                                                 |
| IL3RA/CD123    | IL-3 receptor alpha; forms a dimer with CD131 (common beta chain) to bind IL-3; expressed on pluripotent progenitor cells                                                    |
| IL4R/CD124     | IL-4 receptor; necessary for binding to IL-4 and downstream signalling; also binds to IL-13                                                                                  |
| IL5RA/CD125    | IL-5 receptor alpha subunit; forms a dimer with CSF2RB to form IL-5R; binds IL-5; expressed on eosinophils and some basophils                                                |
| IL5RB/CSF2RB   | IL-5 receptor beta subunit; forms a dimer with CSF2RB to form IL-5R; binds IL-5, IL-3 and GM-CSF; expressed on leukocytes                                                    |
| IL6R/CD126     | IL-6 receptor; forms a dimer with gp130 to bind IL-6 and is necessary for signalling in cells                                                                                |
| IL6ST/gp130    | IL-6 signal transducer; also known as glycoprotein 130 (gp130); forms a dimer with CD126/IL6R for IL-6 signalling in cells                                                   |
| IL7R/CD127     | IL-7 receptor alpha subunit; essential for IL-7 signalling; forms a dimer with CD132; also a marker for memory CD4 T cells                                                   |
| IL8RA/CXCR1    | IL-8 receptor alpha subunit; important for IL-8 signalling, expressed on neutrophils                                                                                         |
| IL9R/CD129     | IL-9 receptor; forms a complex with CD132 to bind IL-9; is found on a variety of cell types                                                                                  |
| IL10RA/CD210a  | IL-10 receptor alpha subunit; expressed on haematopoietic cells; important for IL-10 signalling                                                                              |
| IL10RB/CDw210b | IL-10 receptor beta subunit; ubiquitously expressed; important for IL-10 signalling; also forms a dimer with IL-20R $\alpha$ to bind IL-26                                   |
| IL11RA/CRSDA   | IL-11 receptor alpha subunit; forms a dimer with gp130 to bind IL-11; expressed on haematopoietic cells and signalling is essential for early development in the bone marrow |

|                 |                                                                                                                                                                                                                                                           |
|-----------------|-----------------------------------------------------------------------------------------------------------------------------------------------------------------------------------------------------------------------------------------------------------|
| IL12RB1/CD212   | IL-12 receptor beta subunit 1; forms a dimer with IL-12R $\beta$ 2; necessary for binding to IL-12; expressed on T cells and needed for inducing IFN-gamma production jointly with IL-18                                                                  |
| IL12RB2         | IL-12 receptor beta subunit 2; necessary for binding to IL-12; expressed on T cells and needed for inducing IFN-gamma production jointly with IL-18; may also form a dimer with gp130 to bind IL-35 but the downstream signalling suppresses inflammation |
| IL13RA1/CD213A1 | IL-13 receptor alpha subunit 1; forms a dimer with IL-4R $\alpha$ to bind IL-13; also binds IL-4; expressed on B cells                                                                                                                                    |
| IL13RA2/CD213A2 | IL-13 receptor alpha subunit 2; binds IL-13 with higher affinity than IL-13R $\alpha$ 1; expressed on some tumour cell types i.e. glioma                                                                                                                  |
| IL14R           | Binds to IL-14 (also known as alpha-taxilin) produced by T cells; expressed on B cells and required for activation, cytokine and antibody production                                                                                                      |
| IL15RA/CD215    | IL-15 receptor alpha subunit; forms a complex with IL-2R $\beta$ and CD132 to bind to IL-15 for signalling; expressed on T cells                                                                                                                          |
| CD4 as IL-16R   | The CD4 co-receptor acts as a receptor for IL-16 and is considered important for CD4 T-cell chemoattraction                                                                                                                                               |
| IL17RA/CD217    | IL-17 receptor alpha subunit; involved in IL-17 binding and downstream signalling; usually part of a heteromeric structure consisting of several other members i.e. IL-17R $\beta$ , IL-17Rc; expressed on many cell types and also on CD8 T cells        |
| IL17RB/CRL4     | IL-17 receptor beta subunit; involved in heterodimerisation with IL-17R members to bind IL-17; also IL-25 (IL-17E)                                                                                                                                        |
| IL18RA/CD218a   | IL-18 receptor alpha; important for pro-inflammatory activity and IFN- $\gamma$ production jointly with IL-12; produced by inflammasome activation; may also bind IL-37 with IL-1 receptor 8                                                              |
| IL20RA/CRF2-8   | IL-20 receptor alpha subunit; forms a dimer with IL-20R $\beta$ to bind IL-20; expressed on keratinocytes and epithelial cells; also required for IL-19 and IL-24 signalling; dimerises with IL-10R $\beta$ to bind IL-26                                 |
| IL20RB/DIRS1    | IL-20 receptor beta subunit; forms a dimer with IL-20R $\alpha$ to bind IL-20; expressed on keratinocytes and epithelial cells; also required for IL-19 and IL-24 signalling                                                                              |
| IL21R/CD360     | IL-21 receptor; forms a dimer with the common gamma chain (CD132) and binds to IL-21 for downstream signalling; expressed on T cells, particularly high-affinity memory subsets                                                                           |
| IL22RA1/CRF2-9  | IL-22 receptor alpha subunit 1; forms a dimer with IL-10R $\beta$ 2 for binding IL-22 and downstream signalling; important for pro-inflammatory activity; expressed on parenchymal cells but not on immune cells; also involved in IL-24 signalling       |
| IL23RA          | IL-23 receptor alpha; forms a dimer with IL-12R $\beta$ 1 to bind IL-23; expressed on immune cells, including myeloid cells and Th17 cells; also binds IL-39                                                                                              |

|                   |                                                                                                                                                                                                                                                                                                |
|-------------------|------------------------------------------------------------------------------------------------------------------------------------------------------------------------------------------------------------------------------------------------------------------------------------------------|
| IL27RA/CRL1       | IL-27 receptor alpha subunit; forms a dimer with gp130 to bind IL-27 (also known as IL-30); expressed on T cells                                                                                                                                                                               |
| IL28RA/IFNLR1     | IL-28 receptor alpha; also known as IFN lambda receptor 1; forms a dimer with IL-10Rβ2 for binding IL-28 and IL-29; expressed on T cells and plays a role in augmenting antigen-specific CD8 T-cell responses                                                                                  |
| IL31RA/CRL3       | IL-31 receptor alpha subunit; similar to gp130, and is expressed on monocytes; important for IL-31 binding and signalling                                                                                                                                                                      |
| IL32R             | Probably an intracellular receptor that bind IL-32 (alpha, beta, gamma)                                                                                                                                                                                                                        |
| IL33R/IL1RL1      | IL-1 receptor-like 1 (IL-1RL1); binds IL-33; expressed on T cells and innate lymphoid cells; signalling is important for Th2 development                                                                                                                                                       |
| IL34R/PTP-ζ       | Receptor-type protein-tyrosine phosphatase zeta; binds IL-34; expressed on neuronal progenitors and glial cells                                                                                                                                                                                |
| IL36R/IL1RL2      | IL-1 receptor-like 2 (IL-1RL2); forms a dimer with IL-1 receptor-like 2 (IL-1RL2) to bind IL-36; expressed on T cells; also binds IL-38                                                                                                                                                        |
| IL40R             | Binds IL-40; yet to be described                                                                                                                                                                                                                                                               |
| TRAILR1/TNFRSF10A | TNF receptor superfamily member 10a; forms a dimer with TRAILR2 to bind TRAIL for induction of apoptosis; expressed on a variety of cell types                                                                                                                                                 |
| TRAILR2/TNFRSF10B | TNF receptor superfamily member 10b; forms a dimer with TRAILR1 to bind TRAIL for induction of apoptosis; expressed on a variety of cell types                                                                                                                                                 |
| TRAILR3/TNFRSF10C | TNF receptor superfamily member 10c; forms a dimer with TRAILR4 to bind TRAIL for subverting apoptosis induction; expressed on a variety on cell types                                                                                                                                         |
| TRAILR4/TNFRSF10D | TNF receptor superfamily member 1d; forms a dimer with TRAILR3 to bind TRAIL for subverting apoptosis induction; expressed on a variety on cell types                                                                                                                                          |
| OPG/TNFRSF11B     | Osteoprotegerin; also known as TNF receptor superfamily member 11b; binds TRAIL; expressed on innate immune cells                                                                                                                                                                              |
| CCR1              | Chemokine receptor CCR1; binds CXCL3, 4, 6, 8, 9, 10, 14, 15, 16, 23                                                                                                                                                                                                                           |
| CCR2              | Chemokine receptor CCR2; binds CCL2, 7, 11, 13, 16                                                                                                                                                                                                                                             |
| CCR3              | Chemokine receptor CCR3; binds CCL11, 13, 15, 24, 26, 28                                                                                                                                                                                                                                       |
| CCR4/CD194        | Chemokine receptor CCR4; binds CCL2 (MCP-1), CCL4 (MIP-1), CCL5 (RANTES), CCL17 (TARC), CCL22 (Macrophage-derived chemokine); involved in monocyte chemoattraction and activation; also in identification of Th2 cells; also involved in T-cell penetration into cardiac, lung and skin tissue |
| CCR5/CD195        | Chemokine receptor CCR5; also important for HIV binding and entry into CD4 T cells; binds CCL4, 5, 8, 11, 13, 16,                                                                                                                                                                              |

|                                   |                                                                                                                                                                                                            |
|-----------------------------------|------------------------------------------------------------------------------------------------------------------------------------------------------------------------------------------------------------|
| CCR6/CD196                        | Chemokine receptor CCR6; binds MIP-3 $\alpha$ ; also important for identification of Th17 cells and Th1* cells (with CCR4); also involved in T-cell penetration into the lung                              |
| CCR7/CD197                        | Chemokine receptor CCR7; binds CXCL20 and CXCL21; also a marker for central memory T cells                                                                                                                 |
| CCR8/CDw198                       | Chemokine receptor CCR8; binds CCL1, 16                                                                                                                                                                    |
| CCR9/CDw199                       | Chemokine receptor CCR9; binds CCL25; also involved in T-cell penetration into the gut and liver                                                                                                           |
| CCR10/GPR2                        | Chemokine receptor CCR10; binds CCL28, 28                                                                                                                                                                  |
| CXCR1/CD181                       | Chemokine receptor CXCR1; binds CXCL6, 8                                                                                                                                                                   |
| CXCR2/IL8RB                       | Chemokine receptor CXCR2; also known as IL.8 receptor beta; binds CXCL1, 2, 3, 5, 6, 8                                                                                                                     |
| CXCR3A/GPR9                       | Chemokine receptor CXCR3; binds CXCL9, 10 and 11; CXCR3B                                                                                                                                                   |
| CXCR3B                            | Chemokine receptor CXCR3A isoform CXCR3B; binds CXCL4,9,10,11. Also involved in T-cell penetration into lung and cardiac tissue, and identification of Th1 cells                                           |
| CXCR4/CD184                       | Chemokine receptor CXCR4; binds SDF-1/CXCL12; important for T-cell penetration into the lung                                                                                                               |
| CXCR5/CD185                       | Chemokine receptor CXCR5; binds CXCL13; involved in T-cell migration to B-cell zones in lymph nodes                                                                                                        |
| CXCR6/CD186                       | Chemokine receptor CXCR6; binds CXCL16; involved in T-cell penetration into the liver                                                                                                                      |
| CXCR7/ACKR3                       | Chemokine receptor CXCR7; also known as atypical chemokine receptor 3; binds CXCL11, 12                                                                                                                    |
| TGFBR1/ALK5                       | Transforming growth factor beta receptor 1; also known as anaplastic lymphoma kinase 5 (ALK5); binds with affinity to TGF- $\beta$ 1                                                                       |
| TGFBR2                            | Transforming growth factor beta receptor 2; binds with affinity to TGF- $\beta$ 1                                                                                                                          |
| CD117/KIT                         | Mast/stem cell growth factor receptor (SCFR); also known as c-Kit; expressed on haematopoietic precursors as well as some antigen-specific precursor CD8 T cells; important growth factor                  |
| LTBR/CD18                         | Also known as TNFR superfamily member 3 (TNFRSF3); binds lymphotoxin; expressed on various cell types including parenchymal and stromal cells                                                              |
| VLA4/ITGA4-ITGB1                  | Very-late-antigen 4, comprising alpha integrin 4 and beta integrin 1; binds VCAM-1, SDF-1 and fibronectin; involved in T-cell trafficking to the brain                                                     |
| XCR1                              | Receptor for lymphotactins XCL1 and XCL2; expressed on T cells, macrophages, fibroblasts                                                                                                                   |
| <b><i>Toll-like receptors</i></b> |                                                                                                                                                                                                            |
| TLR1/CD281                        | Toll-like receptor 1; forms a dimer with TLR2 to recognise peptidoglycan; expressed on the cell surface                                                                                                    |
| TLR2/CD282                        | Toll-like receptor 2; forms a dimer with TLR1 to recognise peptidoglycan; also recognises a myriad of bacterial cell components; expressed on the cell surface; regulates CYP1A1 activity in the intestine |
| TLR3/CD283                        | Toll-like receptor 3; recognises dsRNA of viral origin; expressed intracellularly                                                                                                                          |
| TLR4/CD284                        | Toll-like receptor 4; recognises bacterial lipopolysaccharide; important for NF- $\kappa$ B activation and subsequent TNF- $\alpha$ production by APCs; expressed on the cell surface                      |

|                                               |                                                                                                                                                                                                                                                                             |
|-----------------------------------------------|-----------------------------------------------------------------------------------------------------------------------------------------------------------------------------------------------------------------------------------------------------------------------------|
| TLR5/MELIOS                                   | Toll-like receptor 5; recognises bacterial flagellin; also implicated in NF- $\kappa$ B activation and subsequent TNF- $\alpha$ production by APCs                                                                                                                          |
| TLR6/CD286                                    | Toll-like receptor 6; synergises with TLR2 to recognise bacterial lipoproteins; expressed on the cell surface                                                                                                                                                               |
| TLR7                                          | Toll-like receptor 7; recognises endosome-encapsulated ssRNA; generally expressed intracellularly                                                                                                                                                                           |
| TLR8/CD288                                    | Toll-like receptor 8; endosomal molecule which recognises ssRNA, akin to TLR7; expressed intracellularly                                                                                                                                                                    |
| TLR9/CD289                                    | Toll-like receptor 9; recognises bacterial and viral DNA; expressed intracellularly                                                                                                                                                                                         |
| TLR10/CD290                                   | Toll-like receptor 10; shown to be expressed on B cells and neutrophils; expressed intracellularly in epithelial cells; has anti-inflammatory and inflammatory downstream effects; likely to be activated by bacterial ligand i.e. <i>Listeria monocytogenes</i> components |
| <b>Immune-related intracellular molecules</b> |                                                                                                                                                                                                                                                                             |
| ZAP-70                                        | Zeta-chain-associated protein kinase 70; expressed intracellularly in T cells; involved in TCR signalling and T-cell activation                                                                                                                                             |
| MyD88                                         | Myeloid differentiation primary response 88; adapter molecule indispensable for TLR2/4-mediated anti-microbial protection                                                                                                                                                   |
| NF- $\kappa$ B                                | Nuclear factor kappa-light-chain-enhancer of activated B cells; essential for TLR4-mediated primary immune responses                                                                                                                                                        |
| IKBKB                                         | Inhibitor Of Nuclear Factor Kappa B Kinase Subunit Beta; phosphorylates the inhibitor in the inhibitor/NF- $\kappa$ B complex, leading to dissociation of the inhibitor and NF- $\kappa$ B activation                                                                       |
| STING/TMEM173                                 | Stimulator of interferon genes; found in many cell types; important for intracellular pro-inflammatory activity                                                                                                                                                             |
| TBK1                                          | TANK-binding kinase 1; necessary for phosphorylation of STING to activate it                                                                                                                                                                                                |
| CGAS                                          | Cyclic GMP-AMP synthase; generates cyclic GMP-AMP leads to STING activation in cells                                                                                                                                                                                        |
| IDO1                                          | Indoleamine 2,3-dioxygenase 1; heme-containing enzyme important in converting tryptophan to kynurenines; upregulated by IFN- $\gamma$ signalling and has immuno-suppressive function                                                                                        |
| IDO2                                          | Indoleamine 2,3-dioxygenase 2; heme-containing enzyme important in converting tryptophan to kynurenines; upregulated by IFN- $\gamma$ signalling and has immuno-suppressive function                                                                                        |
| JAK1                                          | Janus kinase 1; involved in IFN and other pro-inflammatory cytokine signalling pathways                                                                                                                                                                                     |
| JAK2                                          | Janus kinase 2; involved in IFN and other pro-inflammatory cytokine signalling pathways                                                                                                                                                                                     |
| STAT1                                         | Signal transducer and activator of transcription 1; involved in IFN-mediated inflammatory cell signalling in conjunction with JAK1/2                                                                                                                                        |
| STAT2                                         | Signal transducer and activator of transcription 2; involved in IFN- $\gamma$ signalling pathway                                                                                                                                                                            |

|         |                                                                                                                                                                                                               |
|---------|---------------------------------------------------------------------------------------------------------------------------------------------------------------------------------------------------------------|
| STAT3   | Signal transducer and activator of transcription 3; various cytokine-mediated cell signalling pathways; also important for Th17 activation                                                                    |
| STAT4   | Signal transducer and activator of transcription 4; important for Th1 development                                                                                                                             |
| STAT5   | Signal transducer and activator of transcription 5; important for IL-2 and IL-7-mediated cell proliferation (T cells); also activated downstream of CSF2/GM-CSF signalling                                    |
| STAT6   | Signal transducer and activator of transcription 6; involved in Th2 responses and induction of an anti-apoptosis state in cells                                                                               |
| MAPK1   | Mitogen-activated protein kinase 1; an extracellular signal-regulated kinase (ERK); involved in various cellular processes; important in pro-inflammatory signalling i.e. IL-6, TNF-alpha, IL-18, type 1 IFNs |
| IRF1    | Interferon regulatory factor 1; involved in amplification of JAK/STAT pathway after IFN-gamma signalling initiates; CD8 T cells responses and Th1 responses                                                   |
| IRF2    | Interferon regulatory factor 2; activation inhibits IFN-alpha/beta production                                                                                                                                 |
| IRF3    | Interferon regulatory factor 3; activated by TLR4 signalling and thus may play a role in antibacterial defence; pro-apoptotic properties                                                                      |
| IRF4    | Interferon regulatory factor 4; has a role in MHC-I regulation and thus, CD8 T-cell responses                                                                                                                 |
| IRF5    | Interferon regulatory factor 5; involved in induction of inflammation in response to viruses; apoptosis of infected cells; amplification of primary (innate) responses                                        |
| IRF6    | Interferon regulatory factor 6; has development roles in skin tissue, and potentially tumour-suppressive properties                                                                                           |
| IRF7    | Interferon regulatory factor 7; involved in type I interferon production and antiviral defence; constitutively expressed in lymphoid tissue                                                                   |
| IRF8    | Interferon regulatory factor 8; involved in myeloid-cell differentiation, at the commitment step where common lymphoid progenitors (CMP) differentiate into monocyte precursors                               |
| IRF9    | Interferon regulatory factor 9; interacts with STAT1/2; promotes the cellular toxicity of IFN-alpha potentially through TRAIL activity                                                                        |
| IRF10   | Interferon regulatory factor 10; downstream of IFN-gamma signalling and involved in MHC-I regulation; not associated with cytotoxicity                                                                        |
| NLRP3   | NACHT, LRR and PYD domains-containing protein 3 (NALP3); essential for inflammasome activation                                                                                                                |
| NLRP4   | NACHT, LRR and PYD domains-containing protein 3 (NALP4); also involved in inflammasome activation                                                                                                             |
| MDA-5   | Melanoma Differentiation-Associated protein 5; recognises intracellular dsRNA                                                                                                                                 |
| RIG-I   | Retinoic acid-inducible gene I; dsRNA helicase enzyme with a prominent role in protection against viral infections; may play a role in augmenting clinical responses to cancer therapies                      |
| RAG-1/2 | Recombination-activating genes 1/2; indispensable for rearrangement of TCR and BCR                                                                                                                            |



|                                                                                        |                                                                                                                                                                                              |
|----------------------------------------------------------------------------------------|----------------------------------------------------------------------------------------------------------------------------------------------------------------------------------------------|
| Caspases                                                                               | Intracellular enzymes with a myriad of functions, including processing of pro-inflammatory cytokines such as IL-1 $\beta$ to initiate and/or amplify immune responses                        |
| Granzyme B                                                                             | Important cytotoxic effector molecule produced by CD8 T cells and NK cells; involved in lysing target cells via apoptosis                                                                    |
| Perforin                                                                               | Important effector molecules produced by cytotoxic T cells and NK cells; causes perforations in target cells to allow granzyme penetration to trigger apoptosis                              |
| Granulysin                                                                             | Lytic molecule produced by cytotoxic lymphocytes including CD8 T cells and $\gamma\delta$ T cells                                                                                            |
| TBX21                                                                                  | Also known as T-bet; crucial transcription factor for Th1 maturation and production of IFN-gamma; may also negatively regulate Th22 development                                              |
| GATA3                                                                                  | GATA-3 transcription factor necessary for Th2 polarisation and associated cytokine production by T cells i.e. IL-4, IL-5, IL-13                                                              |
| RORC                                                                                   | Encodes ROR $\gamma$ t, transcription factor necessary for Th17 and Th22 development                                                                                                         |
| AHR                                                                                    | Aryl hydrocarbon receptor; transcription factor which recognises dioxin-like compound intracellularly and in response induces pro-inflammatory responses; important in antibacterial defence |
| <b>DNA repair genes (taken directly from Wood et al., 2001. Science. 291: 1284-89)</b> |                                                                                                                                                                                              |
| <b>Base excision repair (BER)</b>                                                      |                                                                                                                                                                                              |
| <b>DNA glycosylases: major altered base released</b>                                   |                                                                                                                                                                                              |
| UNG                                                                                    | U                                                                                                                                                                                            |
| SMUG1                                                                                  | U                                                                                                                                                                                            |
| MBD4                                                                                   | U or T opposite G at CpG sequences                                                                                                                                                           |
| TDG                                                                                    | U, T or ethenoC opposite G                                                                                                                                                                   |
| OGG1                                                                                   | 8-oxoG opposite C                                                                                                                                                                            |
| MYH                                                                                    | A opposite 8-oxoG                                                                                                                                                                            |
| NTH1                                                                                   | Ring-saturated or fragmented pyrimidines                                                                                                                                                     |
| MPG                                                                                    | 3-meA, ethenoA, hypoxanthine                                                                                                                                                                 |
| <b>Other BER factors</b>                                                               |                                                                                                                                                                                              |
| APE1 (HAP1, APEX, REF1)                                                                | AP endonuclease                                                                                                                                                                              |
| APE2 (APEXL2)                                                                          | AP endonuclease                                                                                                                                                                              |
| LIG3                                                                                   | Main ligation function                                                                                                                                                                       |
| XRCC1                                                                                  | Main ligation function                                                                                                                                                                       |
| <b>Poly(ADP-ribose) polymerase (PARP) enzymes</b>                                      |                                                                                                                                                                                              |
| ADPRT                                                                                  | Protects strand interruptions                                                                                                                                                                |
| ADPRTL2                                                                                | PARP-like enzyme                                                                                                                                                                             |

|                                         |                                            |
|-----------------------------------------|--------------------------------------------|
| ADPRTL3                                 | PARP-like enzyme                           |
| <b>Direct reversal of damage</b>        |                                            |
| MGMT                                    | O6-meG alkyltransferase                    |
| <b>Mismatch excision repair (MMR)</b>   |                                            |
| MSH2                                    | Mismatch and loop recognition              |
| MSH3                                    | Mismatch and loop recognition              |
| MSH6                                    | Mismatch recognition                       |
| MSH4                                    | MutS homolog specialized for meiosis       |
| MSH5                                    | MutS homolog specialized for meiosis       |
| PMS1                                    | Mitochondrial MutL homolog                 |
| MLH1                                    | MutL homolog                               |
| PMS2                                    | MutL homolog                               |
| MLH3                                    | MutL homolog of unknown function           |
| PMS2L3                                  | MutL homolog of unknown function           |
| PMS2L4                                  | MutL homolog of unknown function           |
| <b>Nucleotide excision repair (NER)</b> |                                            |
| XPC                                     | Binds damaged DNA as complex               |
| RAD23B (HR23B)                          | Binds damaged DNA as complex               |
| CETN2                                   | Binds damaged DNA as complex               |
| RAD23A (HR23A)                          | Substitutes for HR23B                      |
| XPA                                     | Binds damaged DNA in preincision complex   |
| RPA1                                    | Binds DNA in preincision complex           |
| RPA2                                    | Binds DNA in preincision complex           |
| RPA3                                    | Binds DNA in preincision complex           |
| TFIIH                                   | Catalyzes unwinding in preincision complex |
| XPB (ERCC3)                             | 3' to 5' DNA helicase                      |
| XPB (ERCC2)                             | 5' to 3' DNA helicase                      |
| GTF2H1                                  | Core TFIIH subunit p62                     |
| GTF2H2                                  | Core TFIIH subunit p44                     |
| GTF2H3                                  | Core TFIIH subunit p34                     |
| GTF2H4                                  | Core TFIIH subunit p52                     |
| CDK7                                    | Kinase subunit of TFIIH                    |
| CCNH                                    | Kinase subunit of TFIIH                    |
| MNAT1                                   | Kinase subunit of TFIIH                    |

|                                  |                                                         |
|----------------------------------|---------------------------------------------------------|
| XPG (ERCC5)                      | 3' incision                                             |
| ERCC1                            | 5' incision subunit                                     |
| XPF (ERCC4)                      | 5' incision subunit                                     |
| LIG1                             | DNA joining                                             |
| <b>NER-related</b>               |                                                         |
| CSA (CKN1)                       | Cockayne syndrome; needed for transcription-coupled NER |
| CSB (ERCC6)                      | Cockayne syndrome; needed for transcription-coupled NER |
| XAB2 (HCNP)                      | Cockayne syndrome; needed for transcription-coupled NER |
| DDB1                             | Complex defective in XP group E                         |
| DDB2                             | Mutated in XP group E                                   |
| MMS19                            | Transcription and NER                                   |
| <b>Homologous recombination</b>  |                                                         |
| RAD51                            | Homologous pairing                                      |
| RAD51L1 (RAD51B)                 | Rad51 homolog                                           |
| RAD51C                           | Rad51 homolog                                           |
| RAD51L3 (RAD51D)                 | Rad51 homolog                                           |
| DMC1                             | Rad51 homolog, meiosis                                  |
| XRCC2                            | DNA break and cross-link repair                         |
| XRCC3                            | DNA break and cross-link repair                         |
| RAD52                            | Accessory factor for recombination                      |
| RAD54L                           | Accessory factor for recombination                      |
| RAD54B                           | Accessory factor for recombination                      |
| BRCA1                            | Accessory factor for transcription and recombination    |
| BRCA2                            | Cooperation with RAD51, essential function              |
| RAD50                            | ATPase in complex with MRE11A, NBS1                     |
| MRE11A                           | 3' exonuclease                                          |
| NBS1                             | Mutated in Nijmegen breakage syndrome                   |
| <b>Nonhomologous end-joining</b> |                                                         |
| Ku70 (G22P1)                     | DNA end binding                                         |
| Ku80 (XRCC5)                     | DNA end binding                                         |
| PRKDC                            | DNA-dependent protein kinase catalytic subunit          |
| LIG4                             | Nonhomologous end-joining                               |
| XRCC4                            | Nonhomologous end-joining                               |
|                                  | Sanitization of nucleotide pools                        |

|                                                                                       |                                                    |
|---------------------------------------------------------------------------------------|----------------------------------------------------|
| MTH1 (NUDT1)                                                                          | 8-oxoGTPase                                        |
| DUT                                                                                   | dUTPase                                            |
| <b>DNA polymerases (catalytic subunits)</b>                                           |                                                    |
| POLB                                                                                  | BER in nuclear DNA                                 |
| POLG                                                                                  | BER in mitochondrial DNA                           |
| POLD1                                                                                 | NER and MMR                                        |
| POLE1                                                                                 | NER and MMR                                        |
| PCNA                                                                                  | Sliding clamp for pol delta and pol epsilon        |
| REV3L (POLZ)                                                                          | DNA pol zeta catalytic subunit, essential function |
| REV7 (MAD2L2)                                                                         | DNA pol zeta subunit                               |
| REV1                                                                                  | dCMP transferase                                   |
| POLH                                                                                  | XP variant                                         |
| POLI (RAD30B)                                                                         | Lesion bypass                                      |
| POLQ                                                                                  | DNA cross-link repair                              |
| DINB1 (POLK)                                                                          | Lesion bypass                                      |
| POLL                                                                                  | Meiotic function                                   |
| POLM                                                                                  | Presumed specialized lymphoid function             |
| TRF4-1                                                                                | Sister-chromatid cohesion                          |
| TRF4-2                                                                                | Sister-chromatid cohesion                          |
| <b>Editing and processing nucleases</b>                                               |                                                    |
| FEN1 (DNase IV)                                                                       | 5' nuclease                                        |
| TREX1 (DNase III)                                                                     | 3' exonuclease                                     |
| TREX2                                                                                 | 3' exonuclease                                     |
| EXO1 (HEX1)                                                                           | 5' exonuclease                                     |
| SPO11                                                                                 | endonuclease                                       |
| <b>Rad6 pathway</b>                                                                   |                                                    |
| UBE2A (RAD6A)                                                                         | Ubiquitin-conjugating enzyme                       |
| UBE2B (RAD6B)                                                                         | Ubiquitin-conjugating enzyme                       |
| RAD18                                                                                 | Assists repair or replication of damaged DNA       |
| UBE2VE (MMS2)                                                                         | Ubiquitin-conjugating complex                      |
| UBE2N (UBC13, BTG1)                                                                   | Ubiquitin-conjugating complex                      |
| <b>Genes defective in diseases associated with sensitivity to DNA damaging agents</b> |                                                    |
| BLM                                                                                   | Bloom syndrome helicase                            |
| WRN                                                                                   | Werner syndrome helicase/3'-exonuclease            |

|                                                                    |                                                    |
|--------------------------------------------------------------------|----------------------------------------------------|
| RECQL4                                                             | Rothmund-Thompson syndrome                         |
| ATM                                                                | Ataxia telangiectasia                              |
| <b>Fanconi anemia</b>                                              |                                                    |
| FANCA                                                              | Involved in tolerance or repair of DNA cross-links |
| FANCB                                                              | Involved in tolerance or repair of DNA cross-links |
| FANCC                                                              | Involved in tolerance or repair of DNA cross-links |
| FANCD                                                              | Involved in tolerance or repair of DNA cross-links |
| FANCE                                                              | Involved in tolerance or repair of DNA cross-links |
| FANCF                                                              | Involved in tolerance or repair of DNA cross-links |
| FANCG (XRCC9)                                                      | Involved in tolerance or repair of DNA cross-links |
| <b>Other identified genes with a suspected DNA repair function</b> |                                                    |
| SNM1 (PS02)                                                        | DNA cross-link repair                              |
| SNM1B                                                              | Related to SNM1                                    |
| SNM1C                                                              | Related to SNM1                                    |
| RPA4                                                               | Similar to RPA2                                    |
| ABH (ALKB)                                                         | Resistance to alkylation damage                    |
| PNKP                                                               | Converts some DNA breaks to ligatable ends         |
| <b>Other conserved DNA damage response genes</b>                   |                                                    |
| ATR                                                                | ATM- and PI-3K-like essential kinase               |
| RAD1 (S. pombe) homolog                                            | PCNA-like DNA damage sensor                        |
| RAD9 (S. pombe) homolog                                            | PCNA-like DNA damage sensor                        |
| HUS1 (S. pombe) homolog                                            | PCNA-like DNA damage sensor                        |
| RAD17 (RAD24)                                                      | RFC-like DNA damage sensor                         |
| TP53BP1                                                            | BRCT protein                                       |
| CHEK1                                                              | Effector kinase                                    |
| CHK2 (Rad53)                                                       | Effector kinase                                    |
